# Supplementary material
Source: PubMed Central journal article supplement (PMC3129806)

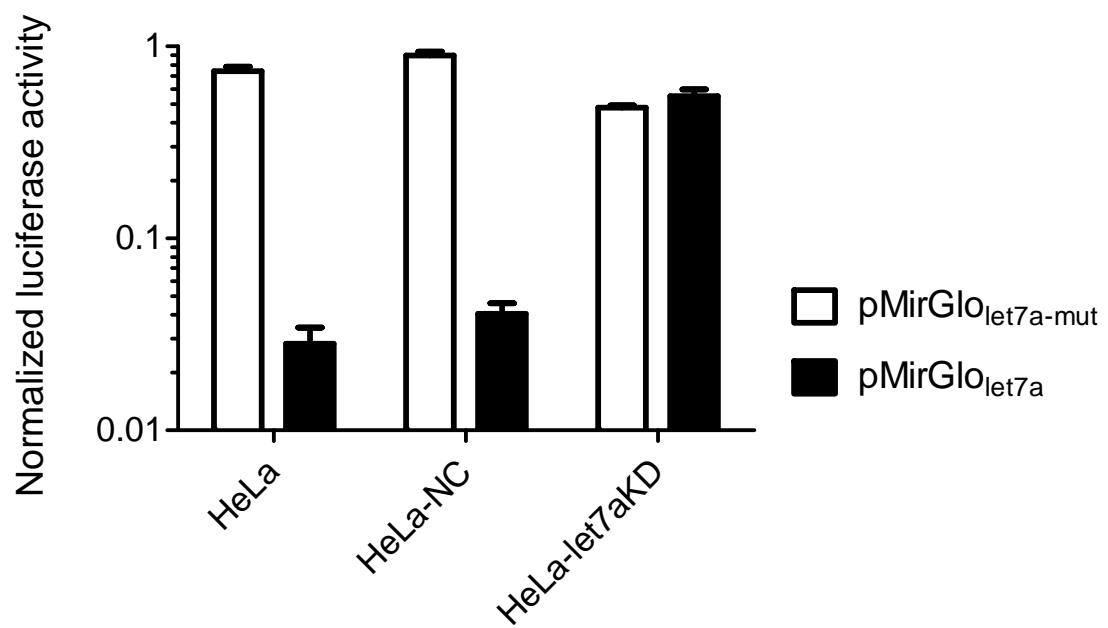

Supplementary Fig. S1

Supplement: mt201136x1.pdf [file mt201136x1.pdf]

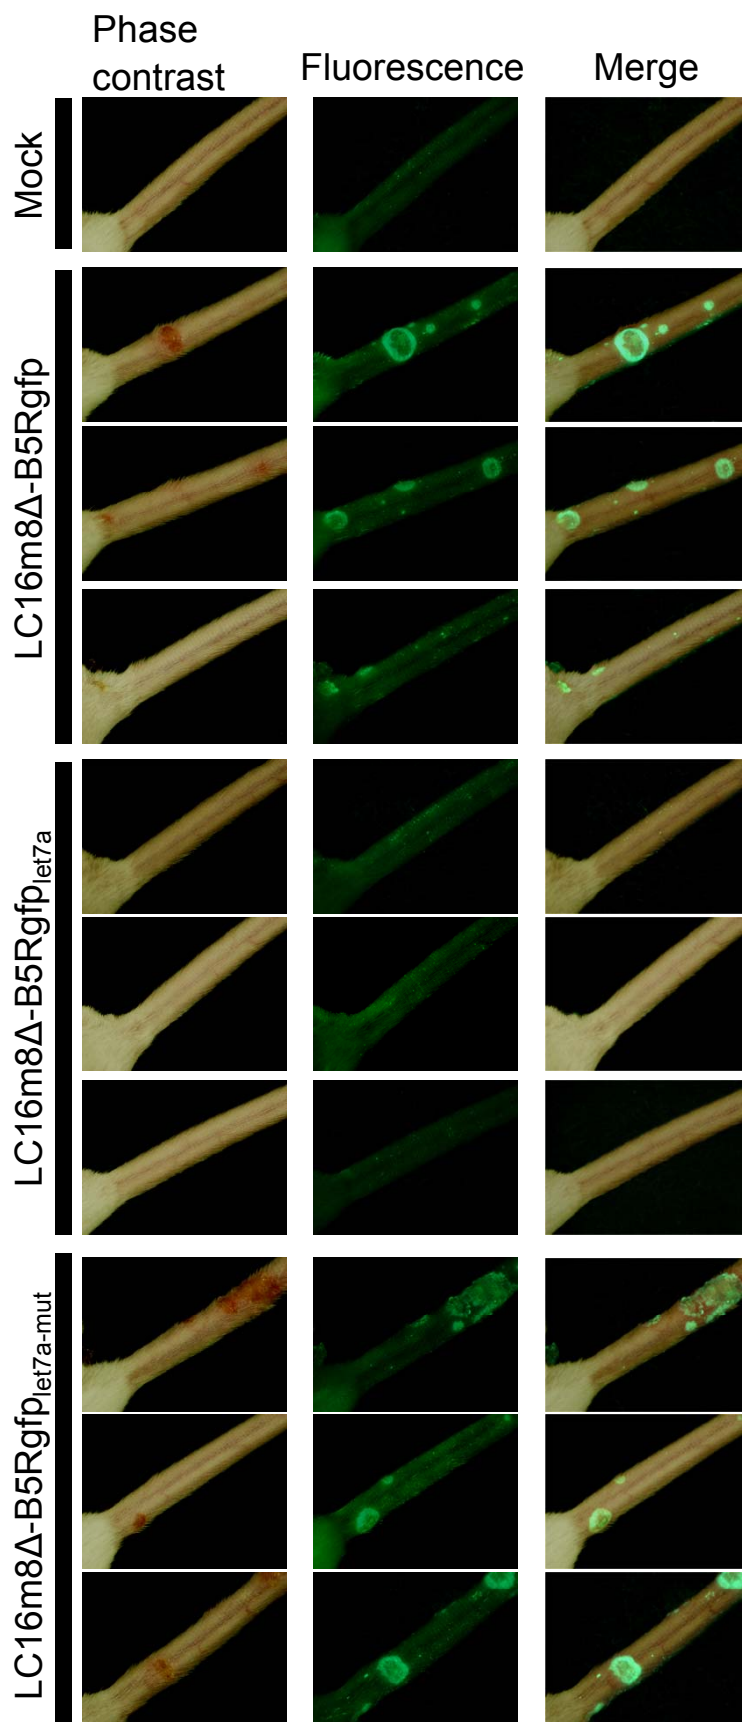

Supplementary Fig. S2

Supplement: mt201136x2.pdf [file mt201136x2.pdf]

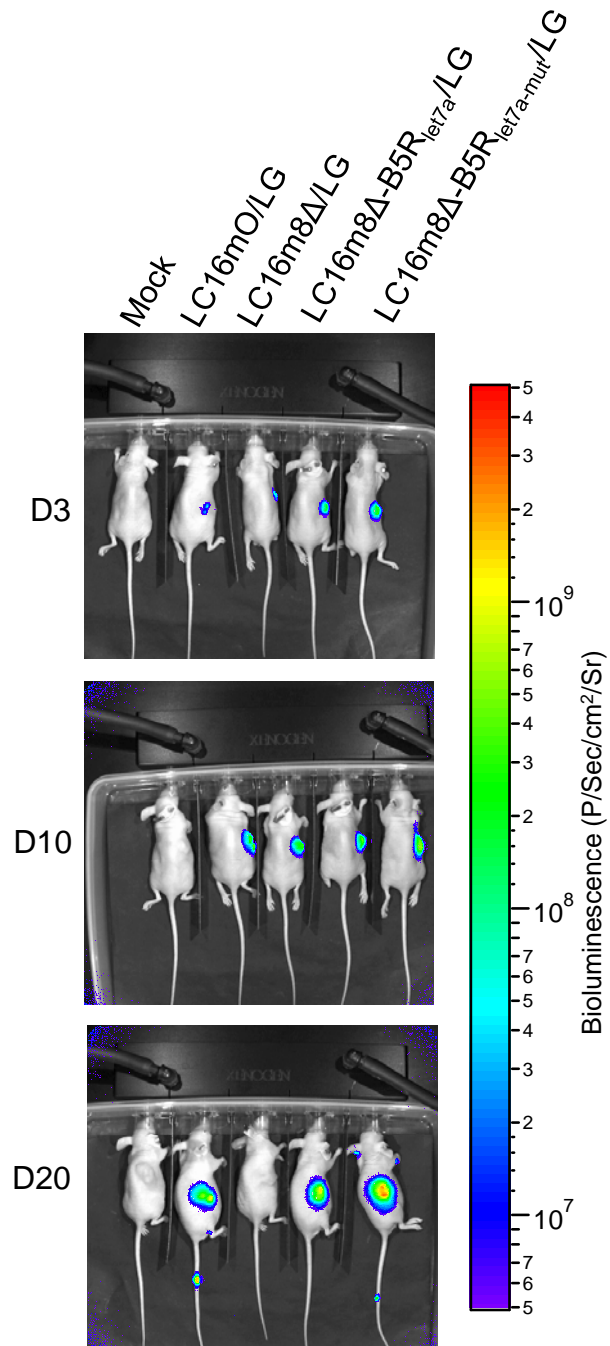

Supplementary Fig. S3

Supplement: mt201136x3.pdf [file mt201136x3.pdf]

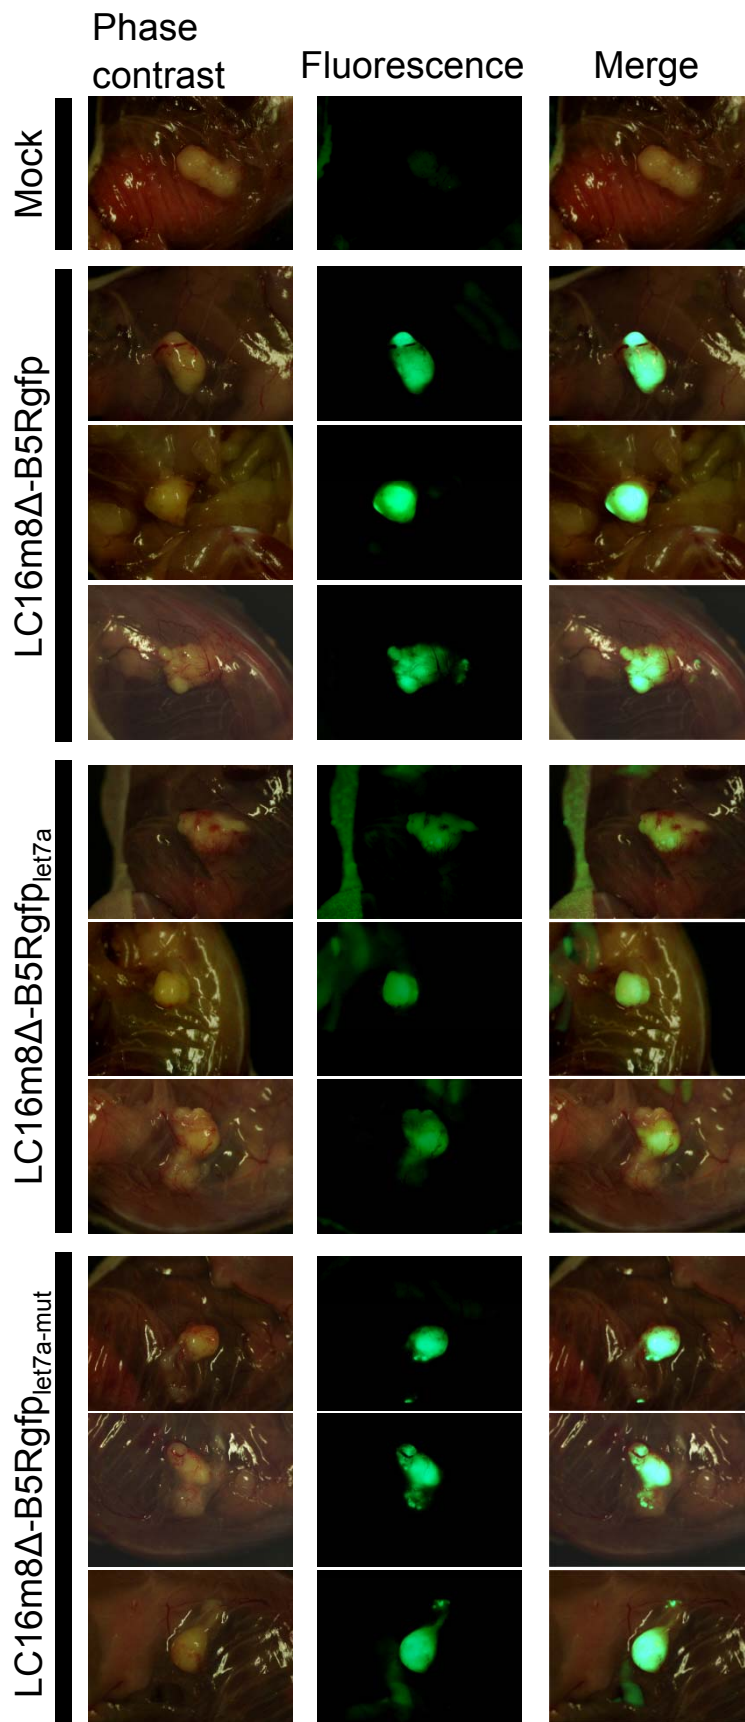

Supplementary Fig. S4

Supplement: mt201136x4.pdf [file mt201136x4.pdf]
